# Supplementary material
Source: PubMed Central journal article supplement (PMC5682217)
Supplement: NIHMS894956-supplement-1.pdf [file NIHMS894956-supplement-1.pdf]

Place ID sticker here

## What did you drink at lunch today?

- ➔ This survey is confidential. We will keep your answers private.
  - DO NOT WRITE YOUR NAME ANYWHERE ON THIS SURVEY.
- ➔ The survey is voluntary. You don't have to answer any questions if you don't want to.
- ➔ Your answers are important to us. There are no right or wrong answers.
- ➔ The questions will ask you about today during lunch. Not yesterday. Not breakfast, or other times at school. Think only about lunch today.
- ➔ If you make a mistake, please clearly mark your correct answer choice.
- ➔ You may not need to answer every question on each page. Please answer the first question on each page and follow the arrows and instructions for the next question.

Today's Date: \_\_\_\_\_

## PART 1 –WHAT DID YOU DRINK TODAY AT LUNCH

**1. What did you drink at lunch today?** List all the beverages you drank at lunch today, even if you just had a sip or two.

## PART 2 – TELL US MORE ABOUT WHAT YOU DRANK AT LUNCH TODAY

Tell us more about what you drank at lunch today. Read the questions below: mark the box next to your answer choice and then follow the arrows to the next question.

First, let's start with an example question. Billy is a 7<sup>th</sup> grader at Happy Middle School. At lunch today he drank a few sips of tap water from a water fountain at school. He did not drink any other beverages. He would fill out the survey like this:

### EXAMPLE - a. Did you drink any WATER FROM A WATER FOUNTAIN AT LUNCH TODAY?

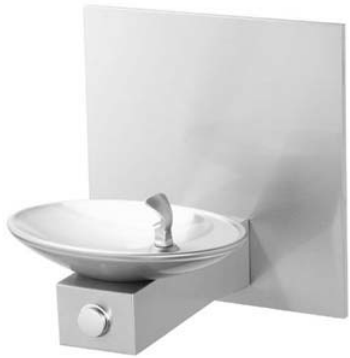

NO, I did not drink any water a water fountain at lunch (*Continue to next page*) →

YES, I drank water from a water fountain at lunch (*Answer the question below*) ↴

### EXAMPLE - b. TODAY, how much WATER FROM A WATER FOUNTAIN did you drink at LUNCH?

I drank a few sips at lunch

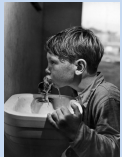

I drank less than 1 glass or ½ bottle at lunch

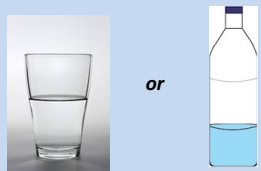

I drank 1 glass or ½ bottle at lunch

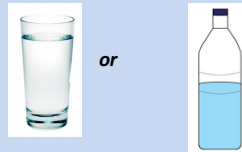

I drank 2 glasses or 1 bottle at lunch

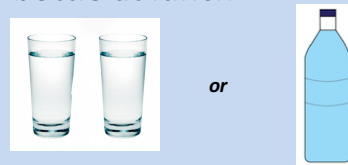

I drank more than 2 glasses or 1 bottle at lunch

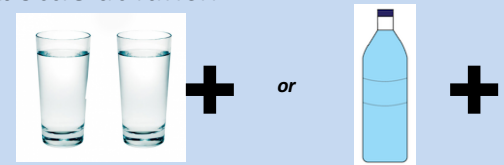

Now, it's your turn to tell us what you drank at lunch.

2a. Did you drink any WATER FROM A WATER FOUNTAIN AT LUNCH TODAY?

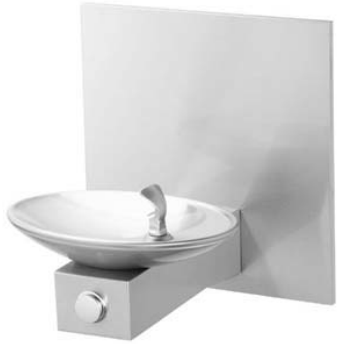

NO, I did not drink any water a water fountain at lunch (*Continue to next page*)

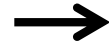

YES, I drank water from a water fountain at lunch (*Answer question 2b below*)

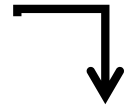

2b. TODAY, how much WATER FROM A WATER FOUNTAIN did you drink at LUNCH?

I drank a few sips at lunch

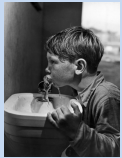

I drank less than 1 glass or ½ bottle at lunch

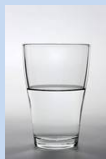

or

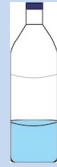

I drank 1 glass or ½ bottle at lunch

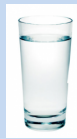

or

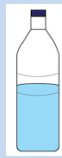

I drank 2 glasses or 1 bottle at lunch

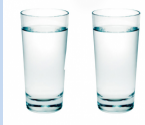

or

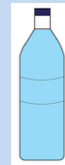

I drank more than 2 glasses or 1 bottle at lunch

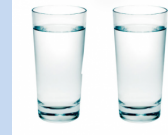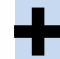

or

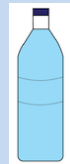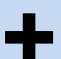

**3a. Did you drink any TAP WATER THAT YOU BROUGHT FROM HOME (for example, in a reusable water bottle) AT LUNCH TODAY? (Tap water is free water from a sink or water fountain)**

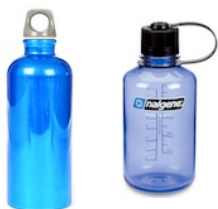

**NO**, I did not drink any tap water that I brought from home at lunch (*Continue to next page*) →

**YES**, I drank tap water that I brought from home at lunch (*Answer questions 4b below*) ↘

**3b. TODAY, how much TAP WATER THAT YOU BROUGHT FROM HOME did you drink at LUNCH?**

I drank a few sips at lunch

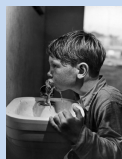

I drank less than 1 glass or ½ bottle at lunch

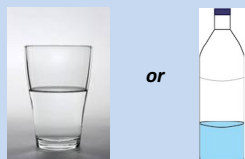

I drank 1 glass or ½ bottle at lunch

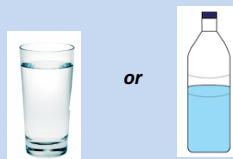

I drank 2 glasses or 1 bottle at lunch

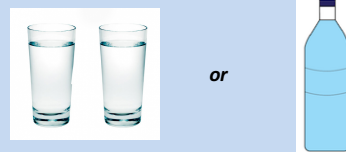

I drank more than 2 glasses or 1 bottle at lunch

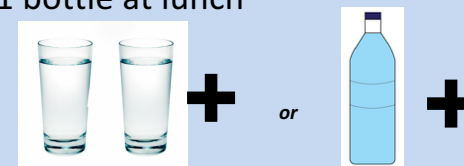

**4a. Did you drink any NON-FLAVORED BOTTLED WATER AT LUNCH TODAY? (Non-flavored bottled water is plain water you buy in a plastic or glass bottle, such as, Dasani, Aquafina, or Pellegrino. Non-flavored bottled water can be with or without bubbles).**

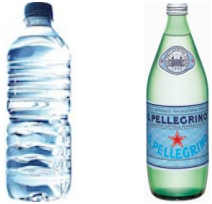

**NO**, I did not drink any non-flavored bottled water at lunch (*Continue to next page*) →

**YES**, I drank non-flavored bottled water at lunch (*Answer questions 5b-d below*) ↘

**4b. What is the name of the non-flavored bottled water you had at lunch today? (Write in the name below; for example: “Dasani”).**

---

**4c. Where did you get the NON-FLAVORED BOTTLED WATER that you drank at lunch? (Mark all answers that apply).**

I got it for free with my lunch

I bought it at school (from the cafeteria, vending machine, or school store)

I got it from a friend at school

I brought it from home

I bought it on the way to school

Somewhere else (tell us where):

---

**4d. TODAY, how much NON-FLAVORED BOTTLED WATER did you drink AT LUNCH?**

I drank a few sips at lunch

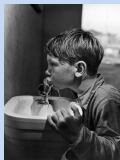

I drank less than 1 glass or ½ bottle at lunch

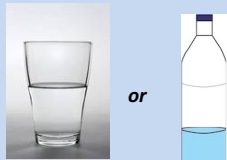

I drank 1 glass or ½ bottle at lunch

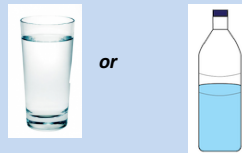

I drank 2 glasses or 1 bottle at lunch

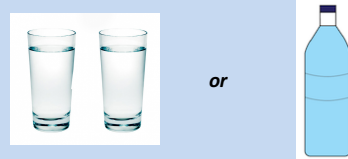

I drank more than 2 glasses or 1 bottle at lunch

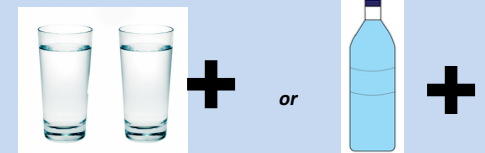

**5a. Did you drink any FLAVORED BOTTLED WATER AT LUNCH TODAY? (Flavored bottled water is water with extra flavoring added that you buy in a plastic or glass bottle, such as Vitamin Water, Clearly Canadian, or Propel. Flavored bottled water can be with or without bubbles.)**

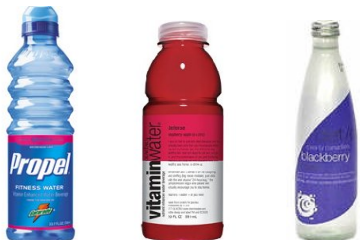

**NO**, I did not drink any flavored bottled water at lunch (*Continue to next page*) →

**YES**, I drank flavored bottled water at lunch (*Answer questions 6b-d below*) ↴

**5b. What is the name of the flavored bottled water you had at lunch today? (Write in the name below; for example: "Strawberry Kiwi Propel").**

---

**5c. Where did you get the FLAVORED BOTTLED WATER that you drank at lunch? (Mark all answers that apply).**

I got it for free with lunch

I bought it at school (from the cafeteria, vending machine, or school store)

I got it from a friend at school

I brought it from home

I bought it on the way to school

Somewhere else (tell us where):  
\_\_\_\_\_

**5d. TODAY, how much FLAVORED BOTTLED WATER did you drink at LUNCH?**

I drank a few sips at lunch



I drank less than 1 glass or ½ bottle at lunch

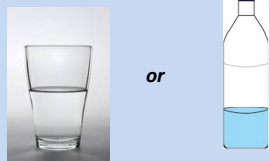

I drank 1 glass or ½ bottle at lunch

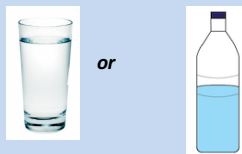

I drank 2 glasses or 1 bottle at lunch

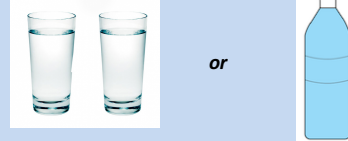

I drank more than 2 glasses or 1 bottle at lunch

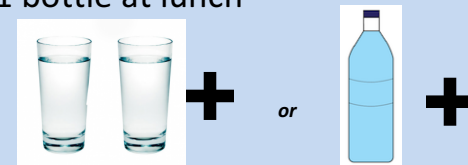

**6a. Did you drink any PLAIN (NON-FLAVORED) MILK AT LUNCH TODAY?**

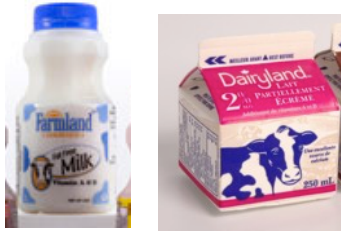

**NO**, I did not drink any plain (non-flavored) milk at lunch (*Continue to next page*) →

**YES**, I drank plain (non-flavored) milk at lunch (*Answer questions 7b-d below*) ↘

**6b. What is the name of the non-flavored milk you had at lunch today? (Write in the name below; for example: “Dairyland 1% milk” or “plain Silk soymilk”).**

---

**6c. Where did you get the PLAIN (NON-FLAVORED) MILK that you drank at lunch? (Mark all answers that apply).**

I got it for free with my lunch

I bought it at school (from the cafeteria, vending machine, or school store)

I got it from a friend at school

I brought it from home

I bought it on the way to school

Somewhere else (tell us where):

---

**6d. TODAY, how much PLAIN (NON-FLAVORED) MILK did you drink at LUNCH?**

I drank a few sips at lunch

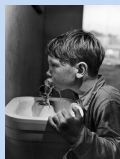

I drank less than 1 glass or 1 carton or ½ bottle at lunch

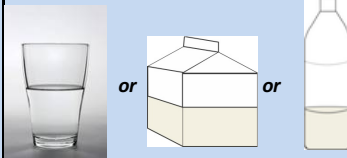

I drank 1 glass or 1 carton or ½ bottle at lunch

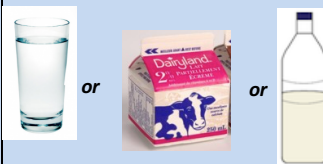

I drank 2 glasses or 2 cartons or 1 bottle at lunch

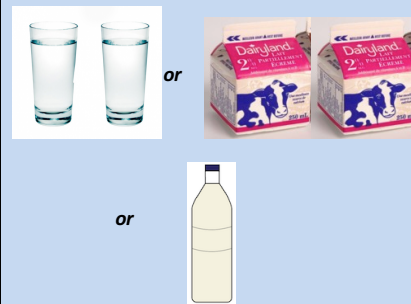

I drank more than 2 glasses or 2 cartons or 1 bottle at lunch

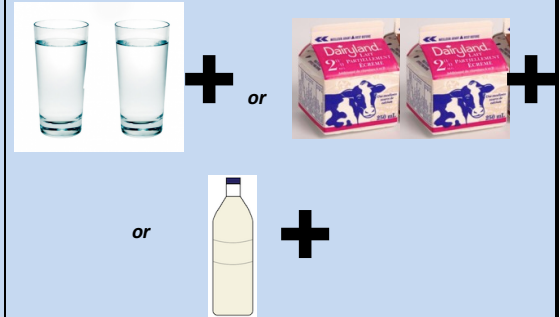



**7a. Did you drink any FLAVORED MILK AT LUNCH TODAY? (Flavored milk includes chocolate, strawberry and vanilla milk).**

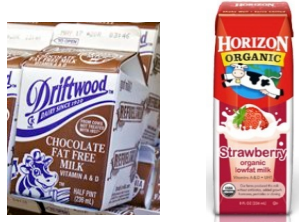

**NO**, I did not drink any flavored milk at lunch (*Continue to next page*) →

**YES**, I drank flavored milk at lunch (*Answer questions 8b-d below*) ↴

**7b. What is the name of the flavored milk you had at lunch today? (Write in the name below; for example: “Nesquik chocolate milk” or “Strawberry Silk soymilk”).**

---

**7c. Where did you get the FLAVORED MILK that you drank at lunch? (Mark all answers that apply).**

|                                                          |                                                                                                       |                                                           |                                                 |                                                           |                                                                   |
|----------------------------------------------------------|-------------------------------------------------------------------------------------------------------|-----------------------------------------------------------|-------------------------------------------------|-----------------------------------------------------------|-------------------------------------------------------------------|
| <input type="checkbox"/> I got it for free with my lunch | <input type="checkbox"/> I bought it at school (from the cafeteria, vending machine, or school store) | <input type="checkbox"/> I got it from a friend at school | <input type="checkbox"/> I brought it from home | <input type="checkbox"/> I bought it on the way to school | <input type="checkbox"/> Somewhere else (tell us where):<br><hr/> |
|----------------------------------------------------------|-------------------------------------------------------------------------------------------------------|-----------------------------------------------------------|-------------------------------------------------|-----------------------------------------------------------|-------------------------------------------------------------------|

**7d. TODAY, how much FLAVORED MILK did you drink at LUNCH?**

|                                                                                                                                             |                                                                                                                                                                            |                                                                                                                                                                   |                                                                                                                                                                       |                                                                                                                                                                                 |
|---------------------------------------------------------------------------------------------------------------------------------------------|----------------------------------------------------------------------------------------------------------------------------------------------------------------------------|-------------------------------------------------------------------------------------------------------------------------------------------------------------------|-----------------------------------------------------------------------------------------------------------------------------------------------------------------------|---------------------------------------------------------------------------------------------------------------------------------------------------------------------------------|
| <input type="checkbox"/> I drank a few sips at lunch<br> | <input type="checkbox"/> I drank less than 1 glass or 1 carton or ½ bottle at lunch<br> | <input type="checkbox"/> I drank 1 glass or 1 carton or ½ bottle at lunch<br> | <input type="checkbox"/> I drank 2 glasses or 2 cartons or 1 bottle at lunch<br> | <input type="checkbox"/> I drank more than 2 glasses or 2 cartons or 1 bottle at lunch<br> |
|---------------------------------------------------------------------------------------------------------------------------------------------|----------------------------------------------------------------------------------------------------------------------------------------------------------------------------|-------------------------------------------------------------------------------------------------------------------------------------------------------------------|-----------------------------------------------------------------------------------------------------------------------------------------------------------------------|---------------------------------------------------------------------------------------------------------------------------------------------------------------------------------|

**8a. Did you drink any DIET DRINKS AT LUNCH TODAY? (Diet drinks include diet soda, diet sports drinks, and diet tea).**

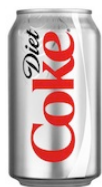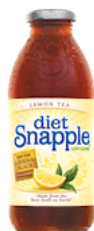

**NO**, I did not drink any diet drinks at lunch (*Continue to next page*) →

**YES**, I drank a diet drink at lunch (*Answer questions 9b-d below*) ↴

**8b. What is the name of the diet drink you had at lunch today? (Write in the name below; for example: “Diet Coke” or “diet Snapple iced tea”).**

---

**8c. Where did you get the DIET DRINK that you drank at lunch? (Mark all answers that apply).**

I got it for free with my lunch

I bought it at school (from the cafeteria, vending machine, or school store)

I got it from a friend at school

I brought it from home

I bought it on the way to school

Somewhere else (tell us where): \_\_\_\_\_

**8d. TODAY, how much DIET DRINK did you drink at LUNCH?**

I drank a few sips at lunch

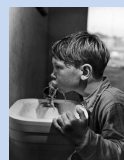

I drank less than 1 glass or ½ bottle at lunch

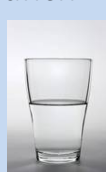

or

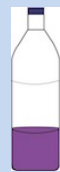

I drank 1 glass or ½ bottle at lunch

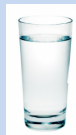

or

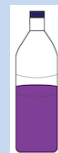

I drank 2 glasses or 1 bottle at lunch

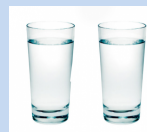

or

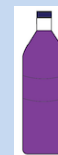

I drank more than 2 glasses or 1 bottle at lunch

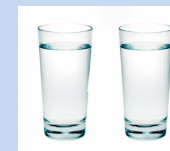

+

or

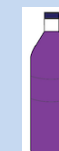

+

**9a. Did you drink any REGULAR (NON-DIET) SODAS OR SOFT DRINKS AT LUNCH TODAY? (Regular sodas include drinks like non-diet Sprite, Coke, Dr. Pepper, and others).**

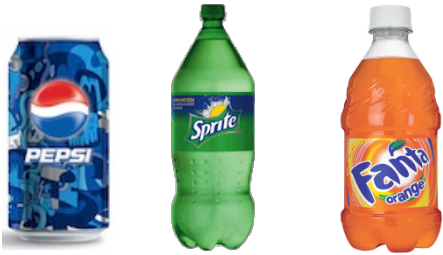

**NO**, I did not drink any regular (non-diet) soda or soft drink at lunch (*Continue to next page*) →

**YES**, I drank regular a (non-diet) soda or soft drink at lunch (*Answer questions 10b - d below*) ↘

**9b. What is the name of soda or soft drink you had at lunch today? (Write in the name below; for example: "Pepsi" or "7-Up").**

---

**9c. Where did you get the REGULAR (NON-DIET) SODA OR SOFT DRINK that you drank at lunch? (Mark all answers that apply).**

I bought it from the school cafeteria

I bought it at school (vending machine, school store)

I got it from a friend at school

I brought it from home

I bought it on the way to school

Somewhere else (tell us where):

---

**9d. TODAY, how much REGULAR (NON-DIET) SODA OR SOFT DRINK did you drink at LUNCH?**

I drank a few sips at lunch

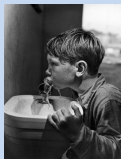

I drank less than 1 glass or ½ bottle at lunch

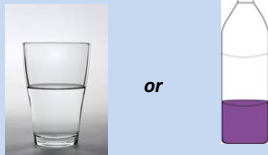

I drank 1 glass or ½ bottle at lunch

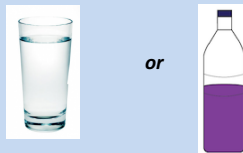

I drank 2 glasses or 1 bottle at lunch

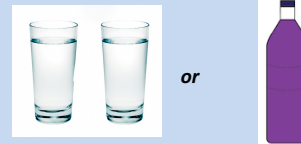

I drank more than 2 glasses or 1 bottle at lunch

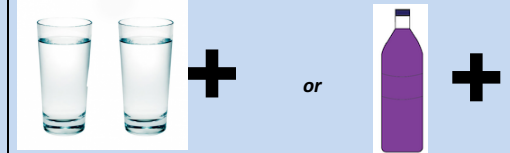

**10a. Did you drink any REGULAR (NON-DIET) SPORTS DRINKS AT LUNCH TODAY? (For example, non-diet Gatorade or Powerade).**

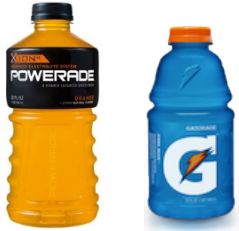

**NO**, I did not drink any sports drinks at lunch (*Continue to next page*) →

**YES**, I drank a sports drink at lunch (*Answer questions 11b - d below*) ↴

**10b. What is the name of the sports drink you had at lunch today? (Write in the name below; for example: "Gatorade").**

---

**10c. Where did you get the REGULAR (NON-DIET) SPORTS DRINK that you drank at lunch? (Mark all answers that apply).**

I got it for free with my lunch

I bought it at school (from the cafeteria, vending machine, or school store)

I got it from a friend at school

I brought it from home

I bought it on the way to school

Somewhere else (tell us where):  
\_\_\_\_\_

**10d. TODAY, how much REGULAR (NON-DIET) SPORTS DRINK did you drink at LUNCH?**

I drank a few sips at lunch

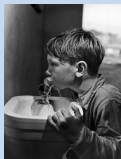

I drank less than 1 glass or ½ bottle at lunch

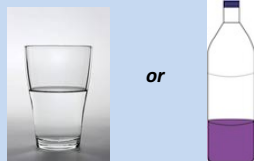

I drank 1 glass or ½ bottle at lunch

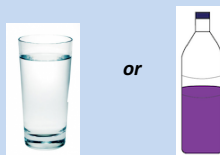

I drank 2 glasses or 1 bottle at lunch

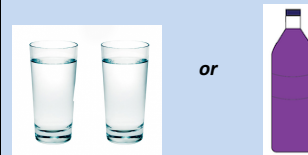

I drank more than 2 glasses or 1 bottle at lunch

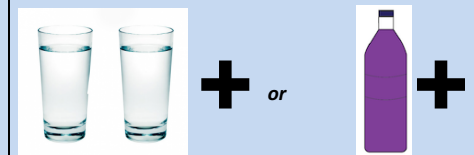

**11a. Did you drink any 100% FRUIT JUICE AT LUNCH TODAY? (For example, 100% orange juice, apple juice or apple juice – do not count fruit-flavored drinks, like Sunny Delight, Capri Sun, lemonade, or aquas frescas).**

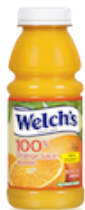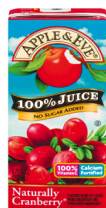

**NO**, I did not any 100% fruit juice at lunch (*Continue to next page*) →

**YES**, I drank 100% fruit juice at lunch (*Answer questions 12b - d below*) ↴

**11b. What is the name of the juice you had at lunch today? (Write in the name below; for example: “Trader Joe’s 100% apple juice” or “Welch’s grape juice”).**

---

**11c. Where did you get the 100% FRUIT JUICE that you drank at lunch? (Mark all answers that apply).**

I got it for free with my lunch

I bought it at school (from the cafeteria, vending machine, or school store)

I got it from a friend at school

I brought it from home

I bought it on the way to school

Somewhere else (tell us where):

---

**11d. TODAY, how much 100% FRUIT JUICE did you drink at LUNCH?**

I drank a few sips at lunch

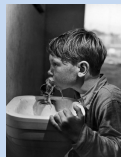

I drank less than 1 glass or 1 carton or ½ bottle at lunch

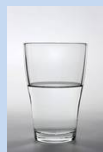

or

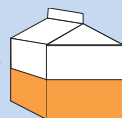

or

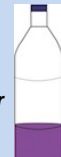

I drank 1 glass or 1 carton or ½ bottle at lunch

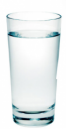

or

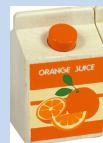

or

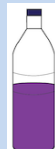

I drank 2 glasses or 2 cartons or 1 bottle at lunch

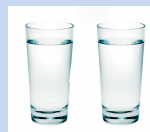

or

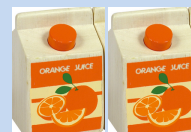

or

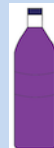

I drank more than 2 glasses or 2 cartons or 1 bottle at lunch

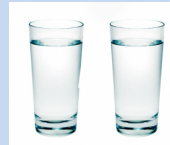

+

or

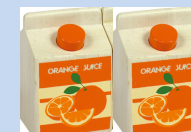

+

or

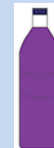

+

**12a. Did you drink any OTHER SUGARY/SWEETENED DRINKS AT LUNCH TODAY? (For example, Sunny-dDelight or Capri Sun, Ices, lemonade, sweetened coffee or tea, aguas frescas, or Kool-Aid).**

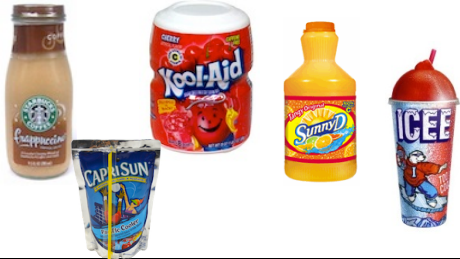

**NO**, I did not drink any other sugary/sweetened drinks at lunch (*Continue to next page*) →

**YES**, I drank other sugary/sweetened drinks at lunch (*Answer questions 13b - d below*) ↘

**12b. What is the name of the other sugary/sweetened drink you had at lunch today? (Write in the name below; for example: “Starbucks Mocha Frappuccino” or “7-11 Slurpee”).**

---

**12c. Where did you get the OTHER SUGARY/SWEETENED DRINKS that you drank at lunch? (Mark all answers that apply).**

|                                                          |                                                                                                       |                                                           |                                                 |                                                           |                                                                   |
|----------------------------------------------------------|-------------------------------------------------------------------------------------------------------|-----------------------------------------------------------|-------------------------------------------------|-----------------------------------------------------------|-------------------------------------------------------------------|
| <input type="checkbox"/> I got it for free with my lunch | <input type="checkbox"/> I bought it at school (from the cafeteria, vending machine, or school store) | <input type="checkbox"/> I got it from a friend at school | <input type="checkbox"/> I brought it from home | <input type="checkbox"/> I bought it on the way to school | <input type="checkbox"/> Somewhere else (tell us where):<br>_____ |
|----------------------------------------------------------|-------------------------------------------------------------------------------------------------------|-----------------------------------------------------------|-------------------------------------------------|-----------------------------------------------------------|-------------------------------------------------------------------|

**12d. TODAY, how much of OTHER SUGARY/SWEETENED DRINK did you drink at LUNCH?**

|                                                                                                                                             |                                                                                                                                                                            |                                                                                                                                                                   |                                                                                                                                                                       |                                                                                                                                                                                 |
|---------------------------------------------------------------------------------------------------------------------------------------------|----------------------------------------------------------------------------------------------------------------------------------------------------------------------------|-------------------------------------------------------------------------------------------------------------------------------------------------------------------|-----------------------------------------------------------------------------------------------------------------------------------------------------------------------|---------------------------------------------------------------------------------------------------------------------------------------------------------------------------------|
| <input type="checkbox"/> I drank a few sips at lunch<br> | <input type="checkbox"/> I drank less than 1 glass or 1 carton or ½ bottle at lunch<br> | <input type="checkbox"/> I drank 1 glass or 1 carton or ½ bottle at lunch<br> | <input type="checkbox"/> I drank 2 glasses or 2 cartons or 1 bottle at lunch<br> | <input type="checkbox"/> I drank more than 2 glasses or 2 cartons or 1 bottle at lunch<br> |
|---------------------------------------------------------------------------------------------------------------------------------------------|----------------------------------------------------------------------------------------------------------------------------------------------------------------------------|-------------------------------------------------------------------------------------------------------------------------------------------------------------------|-----------------------------------------------------------------------------------------------------------------------------------------------------------------------|---------------------------------------------------------------------------------------------------------------------------------------------------------------------------------|

**13a. Did you drink any energy drinks AT LUNCH TODAY? (For example, RedBull, Monster, or Rockstar)**

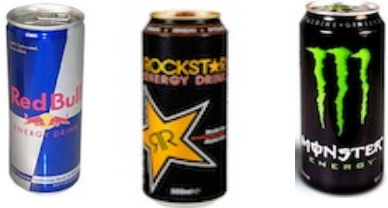

NO, I did not drink any energy drinks at lunch (*Continue to next page*) →

YES, I drank energy drinks at lunch (*Answer questions 14b - d below*) ↴

**13b. What is the name of the energy drink you had at lunch today? (Write in the name below; for example: "RedBull Blue Edition").**

---

**13c. Where did you get the ENERGY DRINK you drank at lunch? (Mark all answers that apply).**

I got it for free with my lunch

I bought it at school (from the cafeteria, vending machine, or school store)

I got it from a friend at school

I brought it from home

I bought it on the way to school

Somewhere else (tell us where):

---

**13d. TODAY, how much of the ENERGY DRINK did you drink at LUNCH?**

I drank a few sips at lunch

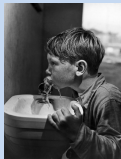

I drank less than 1 glass or ½ bottle at lunch

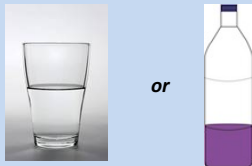

I drank 1 glass or ½ bottle at lunch

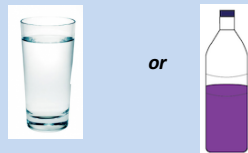

I drank 2 glasses or 1 bottle at lunch

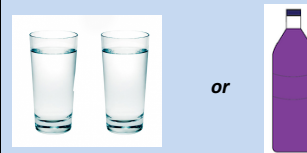

I drank more than 2 glasses or 1 bottle at lunch

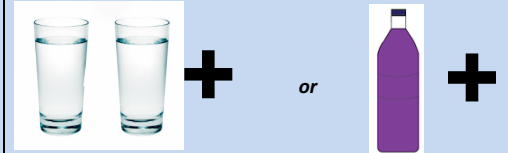



**14a. Did you drink anything else AT LUNCH TODAY? (Something you haven't told us about yet)**

**NO**, I did not drink anything else at lunch (Continue to next page) →

**YES**, I drank another drink at lunch. (Answer questions 15b – d below) ↘

**14b. What is the name of the other drink you had at lunch today? (Write in the name below)**

---

**14c. Where did you get the OTHER DRINK that you drank at lunch? (Mark all answers that apply).**

|                                                          |                                                                                                       |                                                           |                                                 |                                                           |                                                |
|----------------------------------------------------------|-------------------------------------------------------------------------------------------------------|-----------------------------------------------------------|-------------------------------------------------|-----------------------------------------------------------|------------------------------------------------|
| <input type="checkbox"/> I got it for free with my lunch | <input type="checkbox"/> I bought it at school (from the cafeteria, vending machine, or school store) | <input type="checkbox"/> I got it from a friend at school | <input type="checkbox"/> I brought it from home | <input type="checkbox"/> I bought it on the way to school | <input type="checkbox"/> Somewhere else: _____ |
|----------------------------------------------------------|-------------------------------------------------------------------------------------------------------|-----------------------------------------------------------|-------------------------------------------------|-----------------------------------------------------------|------------------------------------------------|

**14d. TODAY, how much of the OTHER DRINK did you drink at LUNCH?**

|                                                                                                                                             |                                                                                                                                                                             |                                                                                                                                                                   |                                                                                                                                                                       |                                                                                                                                                                                 |
|---------------------------------------------------------------------------------------------------------------------------------------------|-----------------------------------------------------------------------------------------------------------------------------------------------------------------------------|-------------------------------------------------------------------------------------------------------------------------------------------------------------------|-----------------------------------------------------------------------------------------------------------------------------------------------------------------------|---------------------------------------------------------------------------------------------------------------------------------------------------------------------------------|
| <input type="checkbox"/> I drank a few sips at lunch<br> | <input type="checkbox"/> I drank less than 1 glass or 1 carton or ½ bottle at lunch<br> | <input type="checkbox"/> I drank 1 glass or 1 carton or ½ bottle at lunch<br> | <input type="checkbox"/> I drank 2 glasses or 2 cartons or 1 bottle at lunch<br> | <input type="checkbox"/> I drank more than 2 glasses or 2 cartons or 1 bottle at lunch<br> |
|---------------------------------------------------------------------------------------------------------------------------------------------|-----------------------------------------------------------------------------------------------------------------------------------------------------------------------------|-------------------------------------------------------------------------------------------------------------------------------------------------------------------|-----------------------------------------------------------------------------------------------------------------------------------------------------------------------|---------------------------------------------------------------------------------------------------------------------------------------------------------------------------------|



## PART 3 – DID YOU LIKE WHAT YOU DRANK AT LUNCH TODAY?

15. How much did you like what you drank TODAY AT LUNCH? For each question, put an “X” in the box that matches your answer choice (like this: ).

| Beverage                                                                                                                                                                                      | I did NOT drink it during LUNCH TODAY | I loved it<br> | I liked it<br> | I didn't like it<br> | I hated it<br> |
|-----------------------------------------------------------------------------------------------------------------------------------------------------------------------------------------------|---------------------------------------|---------------------------------------------------------------------------------------------------|---------------------------------------------------------------------------------------------------|---------------------------------------------------------------------------------------------------------|---------------------------------------------------------------------------------------------------|
| 15a. Water from a water fountain<br> →                                                                       | <input type="checkbox"/>              | <input type="checkbox"/>                                                                          | <input type="checkbox"/>                                                                          | <input type="checkbox"/>                                                                                | <input type="checkbox"/>                                                                          |
| 15b. Tap water you brought from home (e.g., in a reusable water bottle)<br> →                                | <input type="checkbox"/>              | <input type="checkbox"/>                                                                          | <input type="checkbox"/>                                                                          | <input type="checkbox"/>                                                                                | <input type="checkbox"/>                                                                          |
| 15c. Non-flavored bottled water (with or without bubbles - e.g., Dasani, Aquafina, or Pellegrino)<br> →    | <input type="checkbox"/>              | <input type="checkbox"/>                                                                          | <input type="checkbox"/>                                                                          | <input type="checkbox"/>                                                                                | <input type="checkbox"/>                                                                          |
| 15d. Flavored bottled water (with or without bubbles - e.g., lemon Arrowhead, Vitamin Water, Propel)<br> → | <input type="checkbox"/>              | <input type="checkbox"/>                                                                          | <input type="checkbox"/>                                                                          | <input type="checkbox"/>                                                                                | <input type="checkbox"/>                                                                          |

| Beverage                                                                                                                                                  | I did NOT drink it during LUNCH TODAY                                                                        | I loved it<br> | I liked it<br> | I didn't like it<br> | I hated it<br> |
|-----------------------------------------------------------------------------------------------------------------------------------------------------------|--------------------------------------------------------------------------------------------------------------|---------------------------------------------------------------------------------------------------|---------------------------------------------------------------------------------------------------|---------------------------------------------------------------------------------------------------------|---------------------------------------------------------------------------------------------------|
| 15e. Plain (non-flavored) milk<br>                                       |  <input type="checkbox"/>   | <input type="checkbox"/>                                                                          | <input type="checkbox"/>                                                                          | <input type="checkbox"/>                                                                                | <input type="checkbox"/>                                                                          |
| 15f. Flavored milk (e.g., chocolate, strawberry, or vanilla)<br>         |  <input type="checkbox"/>   | <input type="checkbox"/>                                                                          | <input type="checkbox"/>                                                                          | <input type="checkbox"/>                                                                                | <input type="checkbox"/>                                                                          |
| 15g. Diet drinks (e.g., diet soda, diet tea)<br>                         |  <input type="checkbox"/>   | <input type="checkbox"/>                                                                          | <input type="checkbox"/>                                                                          | <input type="checkbox"/>                                                                                | <input type="checkbox"/>                                                                          |
| 15h. Regular soda or soft drinks (e.g., Sprite, Coke, Dr. Pepper)<br>  |  <input type="checkbox"/> | <input type="checkbox"/>                                                                          | <input type="checkbox"/>                                                                          | <input type="checkbox"/>                                                                                | <input type="checkbox"/>                                                                          |
| 15i. Regular (non-diet) sports drinks (e.g., Gatorade or Powerade)<br> |  <input type="checkbox"/> | <input type="checkbox"/>                                                                          | <input type="checkbox"/>                                                                          | <input type="checkbox"/>                                                                                | <input type="checkbox"/>                                                                          |

| Beverage                                                                                                                                                                                                                                                                                                                                                                                                                                                                                                                                                                                                                                                                          | I did NOT drink it during LUNCH TODAY | I loved it<br> | I liked it<br> | I didn't like it<br> | I hated it<br> |
|-----------------------------------------------------------------------------------------------------------------------------------------------------------------------------------------------------------------------------------------------------------------------------------------------------------------------------------------------------------------------------------------------------------------------------------------------------------------------------------------------------------------------------------------------------------------------------------------------------------------------------------------------------------------------------------|---------------------------------------|---------------------------------------------------------------------------------------------------|---------------------------------------------------------------------------------------------------|---------------------------------------------------------------------------------------------------------|---------------------------------------------------------------------------------------------------|
| 15j. 100% Fruit juice (e.g., orange juice, apple juice, grape juice - Do NOT count fruit-flavored drinks, Sunny Delight, aguas frescas, etc.)<br>                                                                                                                                                                                                                                                                              | <input type="checkbox"/>              | <input type="checkbox"/>                                                                          | <input type="checkbox"/>                                                                          | <input type="checkbox"/>                                                                                | <input type="checkbox"/>                                                                          |
| 15k. Other sugary/sweetened drinks such as sweetened juice drinks (e.g., Sunny Delight or Capri Sun, Ices, sweetened coffee or tea, aguas frescas, Kool-aid, etc.)<br>      | <input type="checkbox"/>              | <input type="checkbox"/>                                                                          | <input type="checkbox"/>                                                                          | <input type="checkbox"/>                                                                                | <input type="checkbox"/>                                                                          |
| 15l. Energy drinks (e.g. RedBull, Monster, or Rockstar)<br>                                                                                                                                                                                                                                                                           | <input type="checkbox"/>              | <input type="checkbox"/>                                                                          | <input type="checkbox"/>                                                                          | <input type="checkbox"/>                                                                                | <input type="checkbox"/>                                                                          |
| 15m. Anything else? (Please write down anything else you drank at lunch today):<br> <hr/>                                                                                                                                                                                                                                                                                                                                                                                                                                                                                                      | <input type="checkbox"/>              | <input type="checkbox"/>                                                                          | <input type="checkbox"/>                                                                          | <input type="checkbox"/>                                                                                | <input type="checkbox"/>                                                                          |

## PART 4 – WOULD YOU DRINK WHAT YOU DRANK AT LUNCH TODAY AGAIN?

16. Would you drink the things you drank at lunch today again? For each question, put an “X” in the box that matches your answer choice (like this: ).

| Beverage                                                                                                                                                                                  | I did NOT drink it during LUNCH TODAY | Yes, I would drink it again<br> | Maybe, I might drink it again<br> | No, I wouldn't drink it again<br> |
|-------------------------------------------------------------------------------------------------------------------------------------------------------------------------------------------|---------------------------------------|--------------------------------------------------------------------------------------------------------------------|----------------------------------------------------------------------------------------------------------------------|----------------------------------------------------------------------------------------------------------------------|
| 16a. Water from a water fountain<br>                                                                     | → <input type="checkbox"/>            | <input type="checkbox"/>                                                                                           | <input type="checkbox"/>                                                                                             | <input type="checkbox"/>                                                                                             |
| 16b. Tap water you brought from home (e.g., in a reusable water bottle)<br>                              | → <input type="checkbox"/>            | <input type="checkbox"/>                                                                                           | <input type="checkbox"/>                                                                                             | <input type="checkbox"/>                                                                                             |
| 16c. Non-flavored bottled water (with or without bubbles - e.g., Dasani, Aquafina, or Pellegrino)<br>  | → <input type="checkbox"/>            | <input type="checkbox"/>                                                                                           | <input type="checkbox"/>                                                                                             | <input type="checkbox"/>                                                                                             |
| 16d. Flavored bottled water (with or without bubbles – ex: lemon Arrowhead, Vitamin Water, Propel)<br> | → <input type="checkbox"/>            | <input type="checkbox"/>                                                                                           | <input type="checkbox"/>                                                                                             | <input type="checkbox"/>                                                                                             |
| 16e. Plain (non-flavored) milk<br>                                                                     | → <input type="checkbox"/>            | <input type="checkbox"/>                                                                                           | <input type="checkbox"/>                                                                                             | <input type="checkbox"/>                                                                                             |

| Beverage                                                                                                                                                                                                                                                                                                                   | I did NOT drink it during LUNCH TODAY | Yes, I would drink it again<br> | Maybe, I might drink it again<br> | No, I wouldn't drink it again<br> |
|----------------------------------------------------------------------------------------------------------------------------------------------------------------------------------------------------------------------------------------------------------------------------------------------------------------------------|---------------------------------------|--------------------------------------------------------------------------------------------------------------------|----------------------------------------------------------------------------------------------------------------------|----------------------------------------------------------------------------------------------------------------------|
| 16f. Flavored milk (e.g., chocolate, strawberry, or vanilla)<br>        | → <input type="checkbox"/>            | <input type="checkbox"/>                                                                                           | <input type="checkbox"/>                                                                                             | <input type="checkbox"/>                                                                                             |
| 16g. Diet drinks (e.g., diet soda, diet tea)<br>                                                                                                         | → <input type="checkbox"/>            | <input type="checkbox"/>                                                                                           | <input type="checkbox"/>                                                                                             | <input type="checkbox"/>                                                                                             |
| 16h. Regular soda or soft drinks (e.g., Sprite, Coke, Dr. Pepper)<br>   | → <input type="checkbox"/>            | <input type="checkbox"/>                                                                                           | <input type="checkbox"/>                                                                                             | <input type="checkbox"/>                                                                                             |
| 16i. Regular (non-diet) sports drinks (e.g., Gatorade or Powerade)<br>                                                                                 | → <input type="checkbox"/>            | <input type="checkbox"/>                                                                                           | <input type="checkbox"/>                                                                                             | <input type="checkbox"/>                                                                                             |
| 16j. 100% Fruit juice (e.g., orange juice, apple juice, grape juice - Do NOT count fruit-flavored drinks, Sunny Delight, aguas frescas, etc.)<br>    | → <input type="checkbox"/>            | <input type="checkbox"/>                                                                                           | <input type="checkbox"/>                                                                                             | <input type="checkbox"/>                                                                                             |

| Beverage                                                                                                                                                                                                                                                | I did NOT drink it during LUNCH TODAY                                                                      | Yes, I would drink it again<br> | Maybe, I might drink it again<br> | No, I wouldn't drink it again<br> |
|---------------------------------------------------------------------------------------------------------------------------------------------------------------------------------------------------------------------------------------------------------|------------------------------------------------------------------------------------------------------------|--------------------------------------------------------------------------------------------------------------------|----------------------------------------------------------------------------------------------------------------------|----------------------------------------------------------------------------------------------------------------------|
| 16k. Other sugary/sweetened drinks such as sweetened juice drinks (e.g., Sunny Delight or Capri Sun, Ices, sweetened coffee or tea, aguas frescas, Kool-aid, etc.)<br> |  <input type="checkbox"/> | <input type="checkbox"/>                                                                                           | <input type="checkbox"/>                                                                                             | <input type="checkbox"/>                                                                                             |
| 16l. Energy drinks (e.g. RedBull, Monster, or Rockstar)<br>                                                                                                            |  <input type="checkbox"/> | <input type="checkbox"/>                                                                                           | <input type="checkbox"/>                                                                                             | <input type="checkbox"/>                                                                                             |
| 16m. Anything else? (Please write down anything else you drank at lunch today):<br><hr/>                                                                               | <input type="checkbox"/>                                                                                   | <input type="checkbox"/>                                                                                           | <input type="checkbox"/>                                                                                             | <input type="checkbox"/>                                                                                             |

## PART 5 – ABOUT YOU AND YOUR SCHOOL

### 17. At your school are there any....

|                                                                                                                      | No                       | Yes                      | I'm not sure             |
|----------------------------------------------------------------------------------------------------------------------|--------------------------|--------------------------|--------------------------|
| 17a. Signs around school telling you about drinking more water?                                                      | <input type="checkbox"/> | <input type="checkbox"/> | <input type="checkbox"/> |
| 17b. New places to get free water in the cafeteria, like a water station, a Cambro dispenser, or new water fountain? | <input type="checkbox"/> | <input type="checkbox"/> | <input type="checkbox"/> |
| 17c. School announcements telling you about drinking more water?                                                     | <input type="checkbox"/> | <input type="checkbox"/> | <input type="checkbox"/> |
| 17d. Prizes for drinking water?                                                                                      | <input type="checkbox"/> | <input type="checkbox"/> | <input type="checkbox"/> |

### 18. Did you drink any water from a water fountain today at lunch?

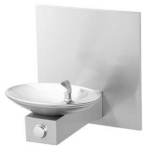

**NO**, I did not drink any water from a water fountain at lunch today.

→Why not? \_\_\_\_\_

**YES**, I did drink water from the water fountain just outside the cafeteria at lunch today.

→What did you like about the water from the water fountain?

\_\_\_\_\_

→What did you dislike about the water from the water fountain?

\_\_\_\_\_

**19. Are you male or female? (Mark one answer)**

Male     Female

**20. How old are you? (Mark one answer)**

11 years old     12 years old     13 years old     14 years old     15 years old

**21. How do you describe yourself? (Mark all answers that apply).**

Latino(a)/Hispanic     Black, African American     White     Filipino  
 Other Asian     Pacific Islander     American Indian or Alaska Native     Some other race or ethnicity (specify): \_\_\_\_\_

**22. If you are Latino(a)/Hispanic, which of the following categories best describes you? (Mark one answer).**

Mexican, Mexican American, or Chicano(a)  
 Salvadorian  
 Honduran  
 Guatemalan  
 Other Latino(a)/Hispanic (specify): \_\_\_\_\_  
 I am not Latino(a)/Hispanic

**23. What language do you speak at home most of the time? (Mark one answer).**

English     Spanish     Tagalog     Vietnamese     Other (specify): \_\_\_\_\_

**24. Were you born in the United States? (Mark one answer).**

Yes     No

**THANK YOU FOR YOUR HELP!**
